# Supplementary material for: Natural Coinfection between Novel Species of Baculoviruses in Spodoptera ornithogalli Larvae
Source: MDPI journal article supplement (doi:10.3390/v13122520), 2021-12-15
Supplement: s1 [file s1]

## Supplementary Materials

Table S1. Sequences used in bioinformatics analysis.

| Genus/<br>Group  | Nomenclature                                                             | Abbreviation | Isolate   | Accession<br>no. |
|------------------|--------------------------------------------------------------------------|--------------|-----------|------------------|
| Alpha<br>Group I | <i>Antheraea pernyi</i><br><i>nucleopolyhedrovirus</i>                   | AnpeNPV      | Z         | NC_008035        |
|                  | <i>Anticarsia gemmatalis</i> multiple<br><i>nucleopolyhedrovirus</i>     | AgMNPV       | 2D        | NC_008520        |
|                  | <i>Autographa californica</i> multiple<br><i>nucleopolyhedrovirus</i>    | AcMNPV       | Clone C6  | NC_001623        |
|                  | <i>Bombyx mori</i> <i>nucleopolyhedrovirus</i>                           | BmNPV        | T3        | NC_001962        |
|                  | <i>Catopsilia pomona</i><br><i>nucleopolyhedrovirus</i>                  | CapoNPV      | 416       | NC_030240        |
|                  | <i>Choristoneura fumiferana</i> multiple<br><i>nucleopolyhedrovirus</i>  | CfMNPV       |           | NC_004778        |
|                  | <i>Condylorrhiza vestigialis</i> multiple<br><i>nucleopolyhedrovirus</i> | CoveMNPV     |           | NC_026430        |
|                  | <i>Dasychira pudibunda</i><br><i>nucleopolyhedrovirus</i>                | DapuNPV      | ML1       | KP747440         |
|                  | <i>Dendrolimus kikuchii</i><br><i>nucleopolyhedrovirus</i>               | DekiNPV      | strain YN | JX193905         |
|                  | <i>Epiphyas postvittana</i><br><i>nucleopolyhedrovirus</i>               | EppoNPV      |           | NC_003083        |
|                  | <i>Hyphantria cunea</i><br><i>nucleopolyhedrovirus</i>                   | HycuNPV      |           | NC_007767        |
|                  | <i>Lonomia obliqua</i> multiple<br><i>nucleopolyhedrovirus</i>           | LoobMNPV     | SP/2000   | KP763670         |
|                  | <i>Maruca vitrata</i> <i>nucleopolyhedrovirus</i>                        | MaviNPV      |           | NC_008725        |
|                  | <i>Orgyia pseudotsugata</i> multiple<br><i>nucleopolyhedrovirus</i>      | OpMNPV       |           | NC_001875        |
|                  | <i>Oxyplax ochracea</i><br><i>nucleopolyhedrovirus</i>                   | OxocNPV      | 435       | MF143631         |
|                  | <i>Philosamia cynthia</i> <i>ricini</i><br><i>nucleopolyhedrovirus</i>   | PhcyNPV      |           | JX404026         |
|                  | <i>Plutella xylostella</i> multiple<br><i>nucleopolyhedrovirus</i>       | PlxyMNPV     | CL3       | NC_008349        |
|                  | <i>Rachiplusia ou</i> multiple<br><i>nucleopolyhedrovirus</i>            | RoMNPV       |           | NC_004323        |
|                  | <i>Samia cynthia</i> <i>nucleopolyhedrovirus</i>                         | SacyNPV      | Nagano    | LC375538         |
|                  | <i>Spilosoma obliqua</i><br><i>nucleopolyhedrovirus</i>                  | SpobNPV      | IIPR      | KY550224         |
|                  | <i>Thysanoplusia orichalcea</i><br><i>nucleopolyhedrovirus</i>           | ThorNPV      | P2        | NC_019945        |
|                  | <i>Adoxophyes honmai</i><br><i>nucleopolyhedrovirus</i>                  | AdhoNPV      |           | NC_004690        |

|                      |                                                            |                |          |           |
|----------------------|------------------------------------------------------------|----------------|----------|-----------|
| Alpha<br>Group<br>II | <i>Agrotis ipsilon multiple nucleopolyhedrovirus</i>       | AgipMNPV       |          | NC_011345 |
|                      | <i>Apocheima cinerarium nucleopolyhedrovirus</i>           | ApciNPV        |          | NC_018504 |
|                      | <i>Buzura suppressaria nucleopolyhedrovirus</i>            | BusuNPV        | Hubei    | NC_023442 |
|                      | <i>Chrysodeixis chalcites nucleopolyhedrovirus</i>         | ChchNPV        |          | NC_007151 |
|                      | <i>Clanis bilineata nucleopolyhedrovirus</i>               | ClbiNPV        | DZ1      | NC_008293 |
|                      | <i>Ectropis obliqua nucleopolyhedrovirus</i>               | EcobNPV        | A1       | NC_008586 |
|                      | <i>Euproctis pseudoconspersa nucleopolyhedrovirus</i>      | EupsNPV        |          | NC_012639 |
|                      | <i>Helicoverpa armigera multiple nucleopolyhedrovirus</i>  | HaMNPV         |          | NC_011615 |
|                      | <i>Helicoverpa armigera nucleopolyhedrovirus</i>           | HaSNPV-G4      | G4       | NC_002654 |
|                      | <i>Hemileuca sp nucleopolyhedrovirus</i>                   | HespNPV        |          | NC_021923 |
|                      | <i>Lambdina fiscellaria nucleopolyhedrovirus</i>           | LafiNPV-GR15   | GR15     | NC_026922 |
|                      | <i>Leucania separata nucleopolyhedrovirus</i>              | LeseNPV        | AH1      | NC_008348 |
|                      | <i>Lymantria dispar multiple nucleopolyhedrovirus</i>      | LdMNPV         |          | NC_001973 |
|                      | <i>Mamestra brassicae multiple nucleopolyhedrovirus</i>    | MabrMNPV-K1    | K1       | NC_023681 |
|                      | <i>Orgyia leucostigma nucleopolyhedrovirus</i>             | OrleNPV        | CFS77    | NC_010276 |
|                      | <i>Peridroma sp nucleopolyhedrovirus</i>                   | PespNPV        | GR-167   | NC_024625 |
|                      | <i>Perigonia lusca simple nucleopolyhedrovirus</i>         | PeluSNPV       |          | NC_027923 |
|                      | <i>Pseudoplusia includens simple nucleopolyhedrovirus</i>  | PsinSNPV-IE    | IE       | NC_026268 |
|                      | <i>Spodoptera exigua multiple nucleopolyhedrovirus</i>     | SeMNPV         |          | NC_002169 |
|                      | <i>Spodoptera frugiperda multiple nucleopolyhedrovirus</i> | SfMNPV-3AP2    | 3AP2     | NC_009011 |
|                      | <i>Spodoptera littoralis nucleopolyhedrovirus</i>          | SpliNPV-AN1956 | AN1956   | JX454574  |
|                      | <i>Spodoptera litura II multiple nucleopolyhedrovirus</i>  | SpltMNPV-II    |          | NC_011616 |
|                      | <i>Sucra jujuba nucleopolyhedrovirus</i>                   | SujuNPV-473    | 473      | KJ676450  |
|                      | <i>Trichoplusia ni simple nucleopolyhedrovirus</i>         | TnSNPV         |          | NC_007383 |
|                      | <i>Spodoptera frugiperda multiple nucleopolyhedrovirus</i> | SfMNPV-Col     | Colombia | KF891883  |
| Beta                 | <i>Adoxophyes orana granulovirus</i>                       | AdorGV         |          | NC_005038 |
|                      | <i>Agrotis segetum granulovirus</i>                        | AgseGV         |          | NC_005839 |
|                      | <i>Clostera anachoreta granulovirus</i>                    | ClanGV         | HBHN     | NC_015398 |

|       |                                              |         |           |           |
|-------|----------------------------------------------|---------|-----------|-----------|
|       | <i>Cryptophlebia leucotreta granulovirus</i> | CrleGV  |           | NC_005068 |
|       | <i>Cydia pomonella granulovirus</i>          | CpGV    |           | NC_002816 |
|       |                                              |         | Parana-   |           |
|       | <i>Diatraea saccharalis granulovirus</i>     | DisaGV  | 2009      | NC_028491 |
|       | <i>Epinotia aporema granulovirus</i>         | EpapGV  |           | NC_018875 |
|       | <i>Erinnyis ello granulovirus</i>            | ErelGV  | BrS86     | NC_025257 |
|       | <i>Helicoverpa armigera granulovirus</i>     | HearGV  |           | NC_010240 |
|       |                                              |         | Southern  |           |
|       | <i>Mocis latipes granulovirus</i>            | MolaGV  | Brazil    | NC_029996 |
|       | <i>Mythimna unipuncta granulovirus</i>       | MyunGV  | #8        | NC_033780 |
|       | <i>Phthorimaea operculella granulovirus</i>  | PhopGV  |           | NC_004062 |
|       | <i>Pseudaletia unipuncta granulovirus</i>    | PsunGV  | Hawaiiin  | NC_013772 |
|       | <i>Pieris rapae granulovirus</i>             | PiraGV  | Wuhan     | NC_013797 |
|       | <i>Plodia interpunctella granulovirus</i>    | PlinGV  | Cambridge | NC_032255 |
|       | <i>Plutella xylostella granulovirus</i>      | PxGV    |           | NC_002593 |
|       | <i>Spodoptera frugiperda granulovirus</i>    | SpfrGV  | VG008     | NC_026511 |
|       | <i>Spodoptera litura granulovirus</i>        | SpltGV  | K1        | NC_009503 |
|       | <i>Trichplusia ni granulovirus</i>           | TrniGV  | LBIV-12   | KU752557  |
|       | <i>Xestia c nigrum granulovirus</i>          | XecnGV  |           | NC_002331 |
| Gamma | <i>Neodiprion lecontei</i>                   |         |           |           |
|       | <i>nucleopolyhedrovirus</i>                  | NeleNPV |           | NC_005906 |
|       | <i>Neodiprion sertifer</i>                   |         |           |           |
|       | <i>nucleopolyhedrovirus</i>                  | NeseNPV |           | NC_005905 |
|       | <i>Neodiprion abietis</i>                    |         |           |           |
|       | <i>nucleopolyhedrovirus</i>                  | NeabNPV |           | DQ317692  |
| Delta | <i>Culex nigripalpus</i>                     |         | Florida   |           |
|       | <i>nucleopolyhedrovirus</i>                  | CuniNPV | 1997      | NC_003084 |

Alpha: *Alphabaculovirus*; Beta: *Betabaculovirus*; Gamma: *Gammabaculovirus*; Delta: *Deltabaculovirus*.
